# Supplementary material for: Causes of growing middle-upper tropospheric ozone over the Northwest Pacific region
Source: Copernicus journal article supplement (doi:10.5194/egusphere-2023-2411), 2024-03-20
Supplement: Supplementary file 1 [file egusphere-2023-2411-supplement.pdf]

1 **Supplementary material for the following ACP submission**

2 **Causes of growing middle-upper tropospheric ozone over the**  
3 **Northwest Pacific region**

4 Xiaodan Ma<sup>1,2</sup>, Jianping Huang<sup>3,4</sup>, Michaela I. Hegglin<sup>2,5</sup>, Patrick Jöckel<sup>6</sup>, and Tianliang Zhao<sup>1</sup>

5 <sup>1</sup>Collaborative Innovation Center on Forecast and Evaluation of Meteorological Disasters, Key Laboratory for  
6 Aerosol-Cloud-Precipitation of China Meteorological Administration, Nanjing University of Information Science and  
7 Technology, Nanjing 210044, China.

8  
9 <sup>2</sup>Institute of Energy and Climate Research – Stratosphere (IEK-7), Forschungszentrum Jülich, Jülich, Germany.

10  
11 <sup>3</sup>Lynker, Environmental Modeling Center, NOAA National Centers for Environmental Prediction, College Park, MD,  
12 USA.

13  
14 <sup>4</sup>Center for Spatial Information Science and Systems, College of Science, George Mason University, Fairfax, VA  
15 22030, USA.

16 <sup>5</sup>Department of Meteorology, University of Reading, Reading, United Kingdom

17  
18 <sup>6</sup>Deutsches Zentrum für Luft- und Raumfahrt (DLR), Institut für Physik der Atmosphäre, Oberpfaffenhofen, Germany

19 *Correspondence to:* Jianping Huang (jianping.huang@noaa.gov)

20

21 Contents of this file

22 Figures [S1](#) to [S3](#)

23

24

25

26

27

28

29

30

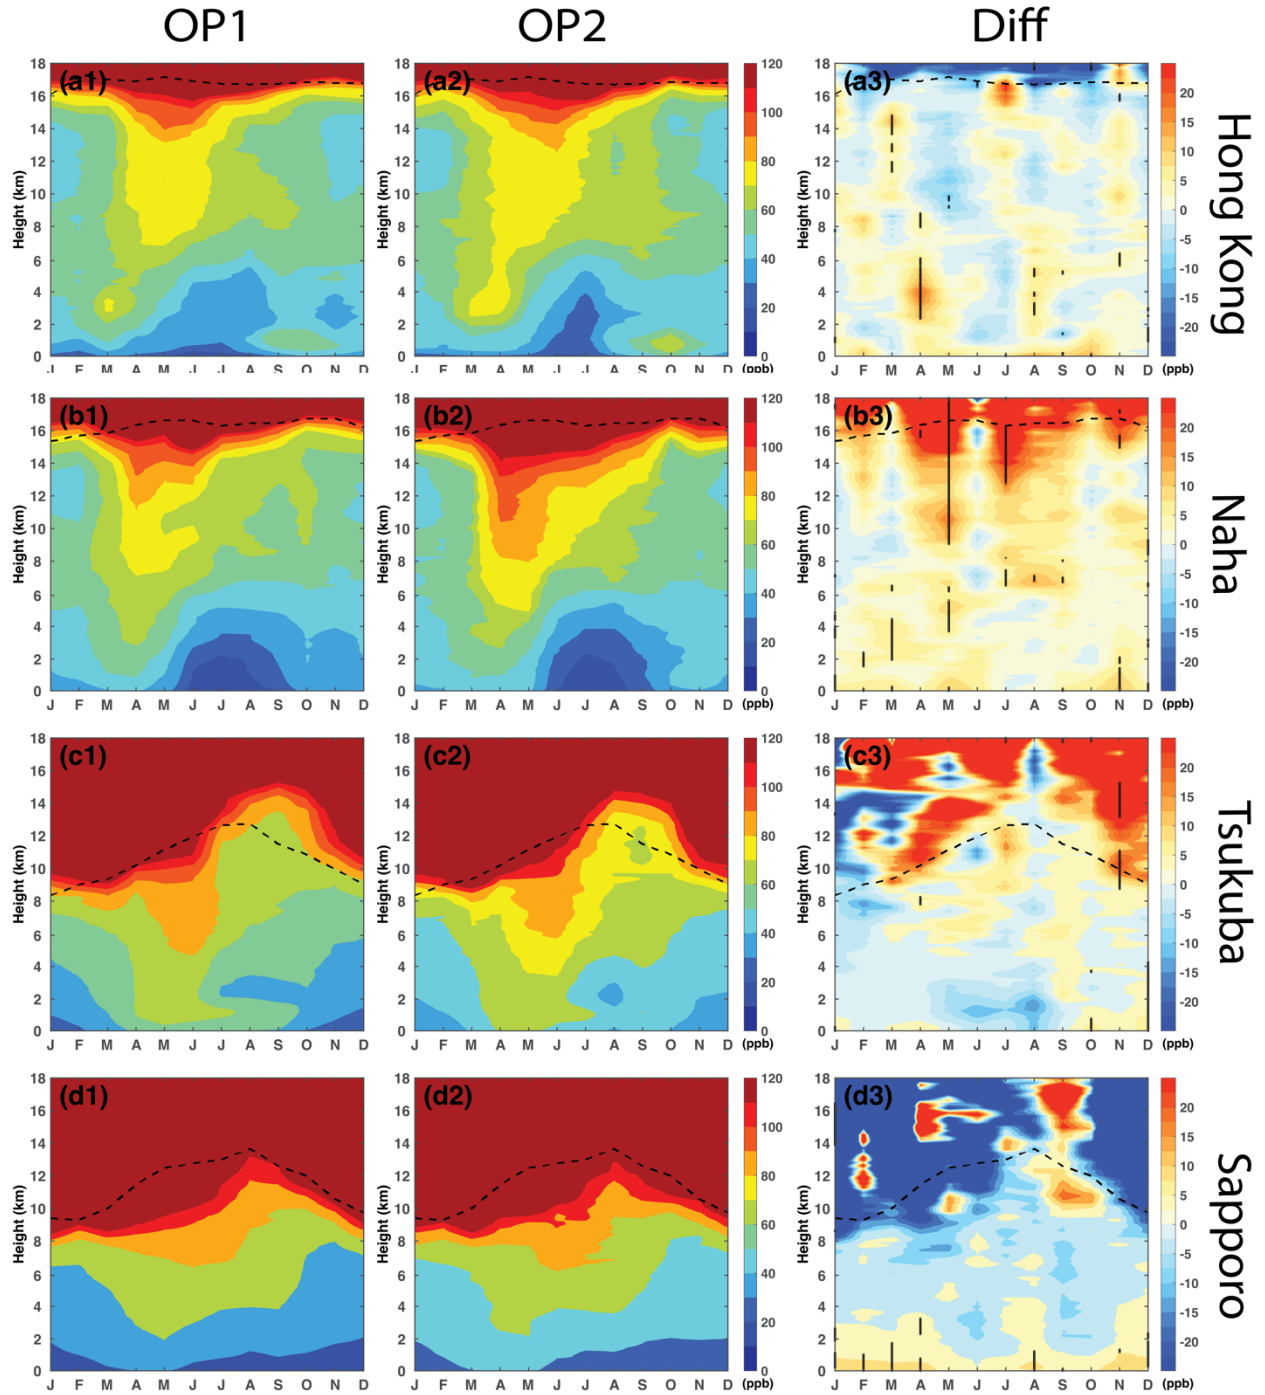

31

32

33

34

35

36

Figure S1. Monthly evolution of the vertical distribution of mean  $O_3$  in the first overlapping period (OP1: 2000-2008), the last overlapping period (OP2: 2009-2017), and the difference between OP2 and OP1 of  $O_3$  at four observation sites (a1-a3) Hong Kong, (b1-b3) Naha, (c1-c3) Tsukuba and (d1-d3) Sapporo. Black dash lines indicate tropopause height. Dots in the i-l represent the layer with statistically significant changes according to a paired two-sided t-test ( $p < 0.05$ ).

37  
38  
39

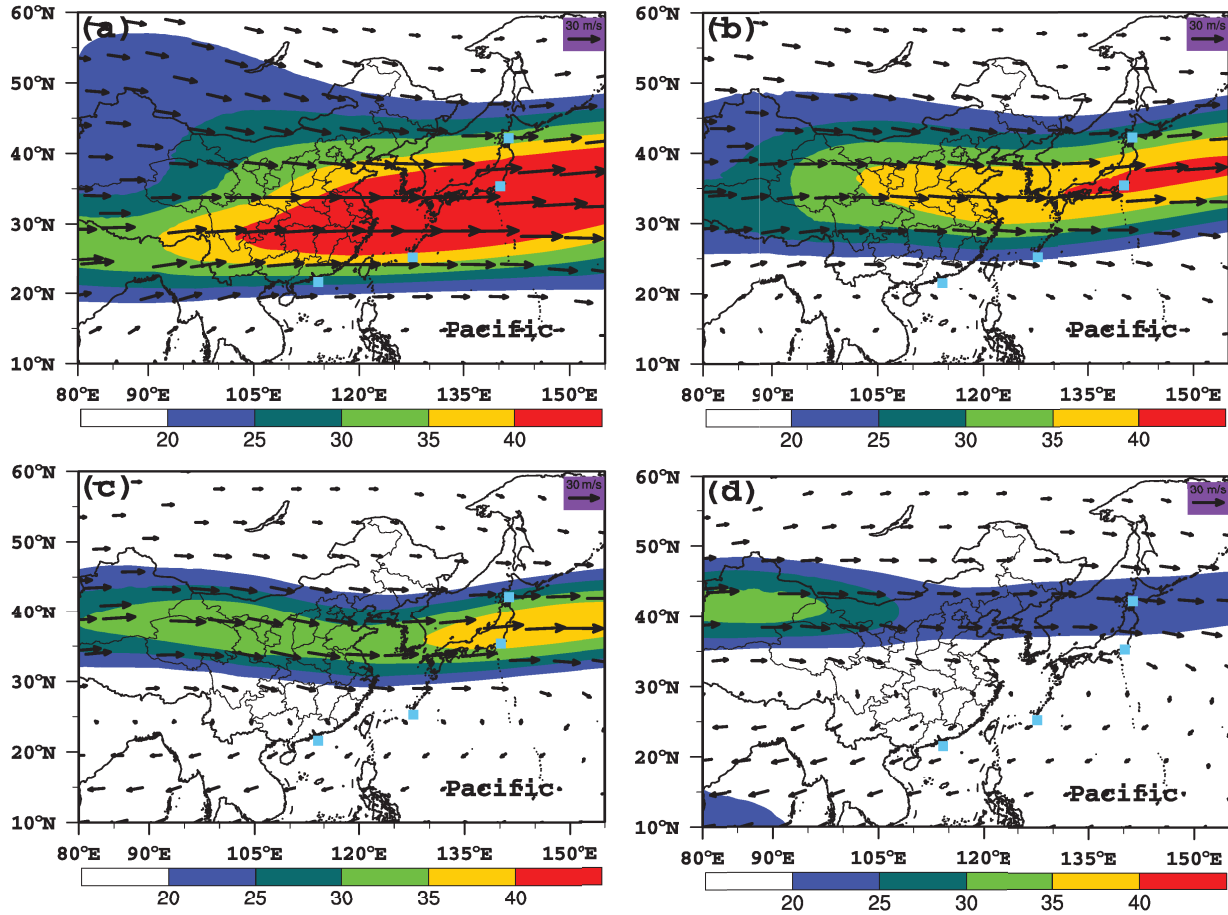

40  
41  
42  
43  
44

Figure S2. The wind field (vector) and wind speed (color shades) retrieved from ERA5 (the fifth generation ECMWF reanalysis) at 200hPa in (a) April, (b) May, (c) June, and (d) July averaged over 1990-2020. Four O<sub>3</sub>-sounding sites are indicated in the blue squares.

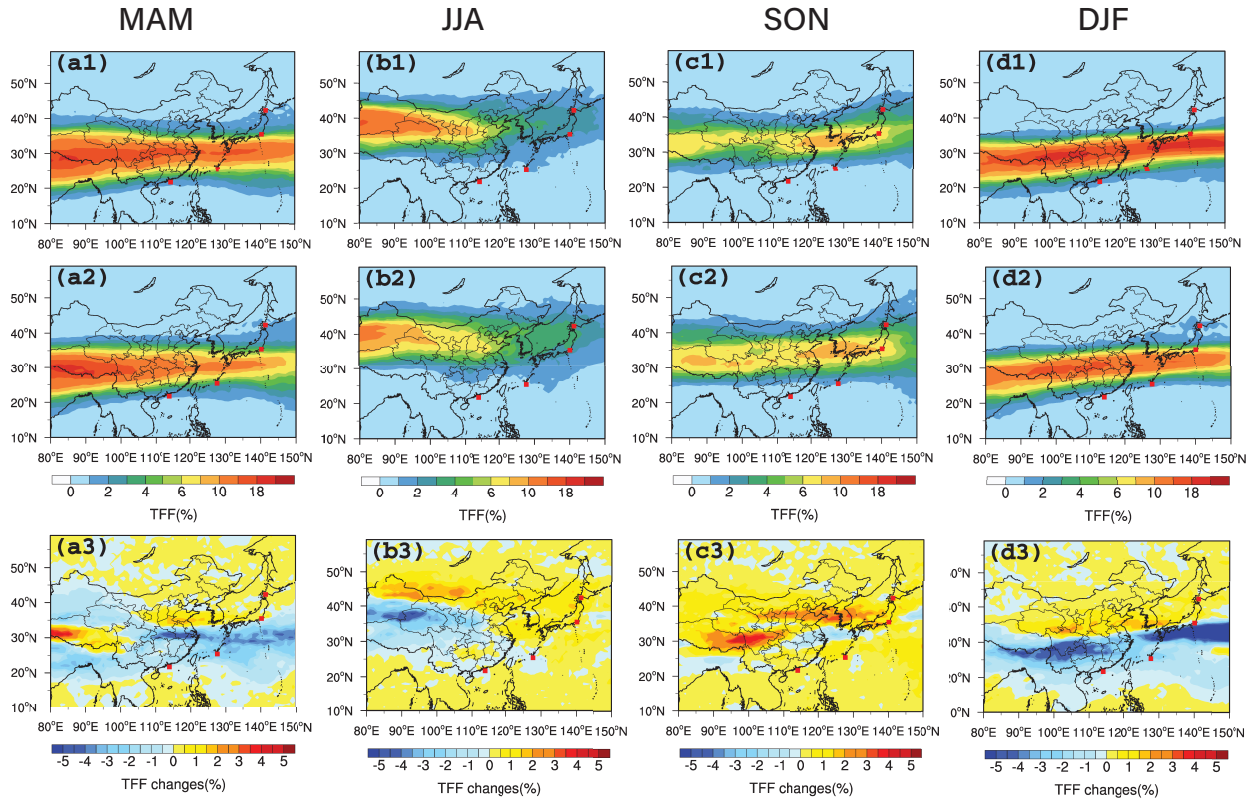

45

46 **Figure S3. Distribution of tropopause folding frequency, a product provided by ETH Zurich, during the 1990s (a1-d1),**  
 47 **2010s (a2-d2) and its changes (a3-d3) at (a) spring, (b) summer, (c) autumn and (d) winter.**

48

49

50
